# Supplementary material
Source: Springer Nature journal article supplement (https://www.springermedizin.de/resource/supplementary/40345_2013_21_MOESM4_ESM.pdf/25658314)

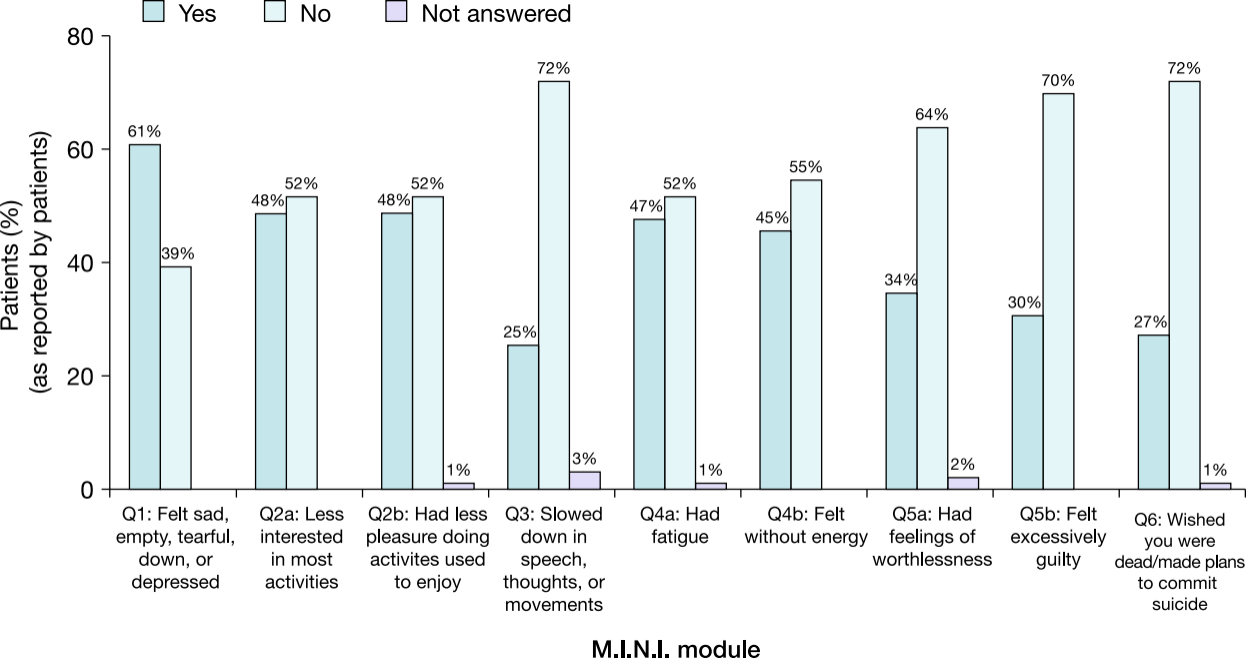

Supplement: MOESM4 [file 25658314]
